# Supplementary material for: Silver decahedral nanoparticles with uniform and adjustable sizes for surface-enhanced Raman scattering-based thiram residue detection
Source: Royal Society of Chemistry journal article supplement (doi:10.1039/d3ay01196h), 2023-01-01
Supplement: d3ay01196h1.pdf [file d3ay01196h1.pdf]

**Electronic Supplementary Material (ESI) for Analytical Methods.  
This journal is © The Royal Society of Chemistry 2023**

Supporting information

**Silver decahedral nanoparticles with uniform and adjustable sizes  
for surface-enhanced Raman scattering-based thiram residue  
detection**

Hongda Sun<sup>a</sup>, Yu Tian<sup>b,c,\*</sup>, Jinping Wei<sup>a</sup>, Wenli Wei<sup>b,c</sup>, Zhichao Zhang<sup>a</sup>, Shuang Han<sup>a,\*</sup>, Wenxin Niu<sup>b,c,\*</sup>

<sup>a</sup>School of Science, Shenyang University of Chemical Technology, Shenyang 110142, China

<sup>b</sup>State Key Laboratory of Electroanalytical Chemistry, Changchun Institute of Applied Chemistry, Chinese Academy of Sciences, Changchun 130022, China

<sup>c</sup>University of Science and Technology of China, Hefei 230026, China

Corresponding author: Wenxin Niu

E-mail address: niuwx@ciac.ac.cn

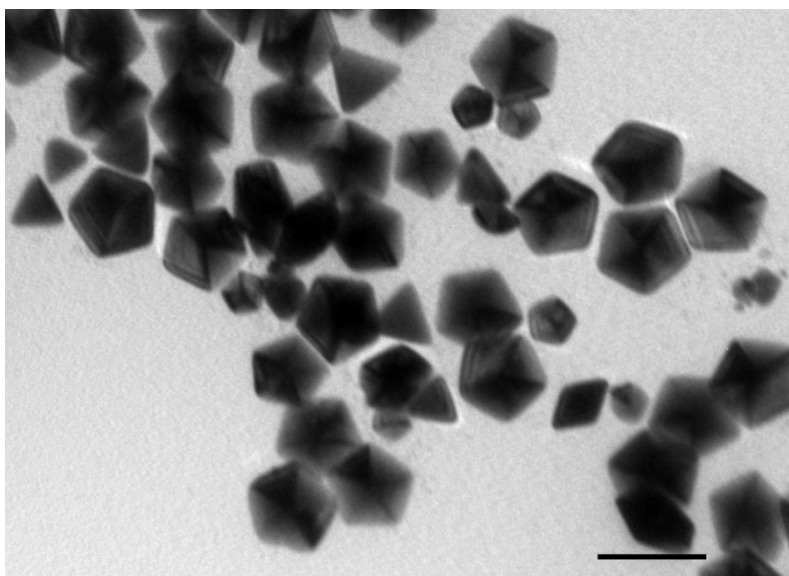

**Fig. S1** The TEM images of the AgDeNPs obtained by increasing the molar ratio of Ag ions to decahedral seeds. (Scale bar: 200 nm)

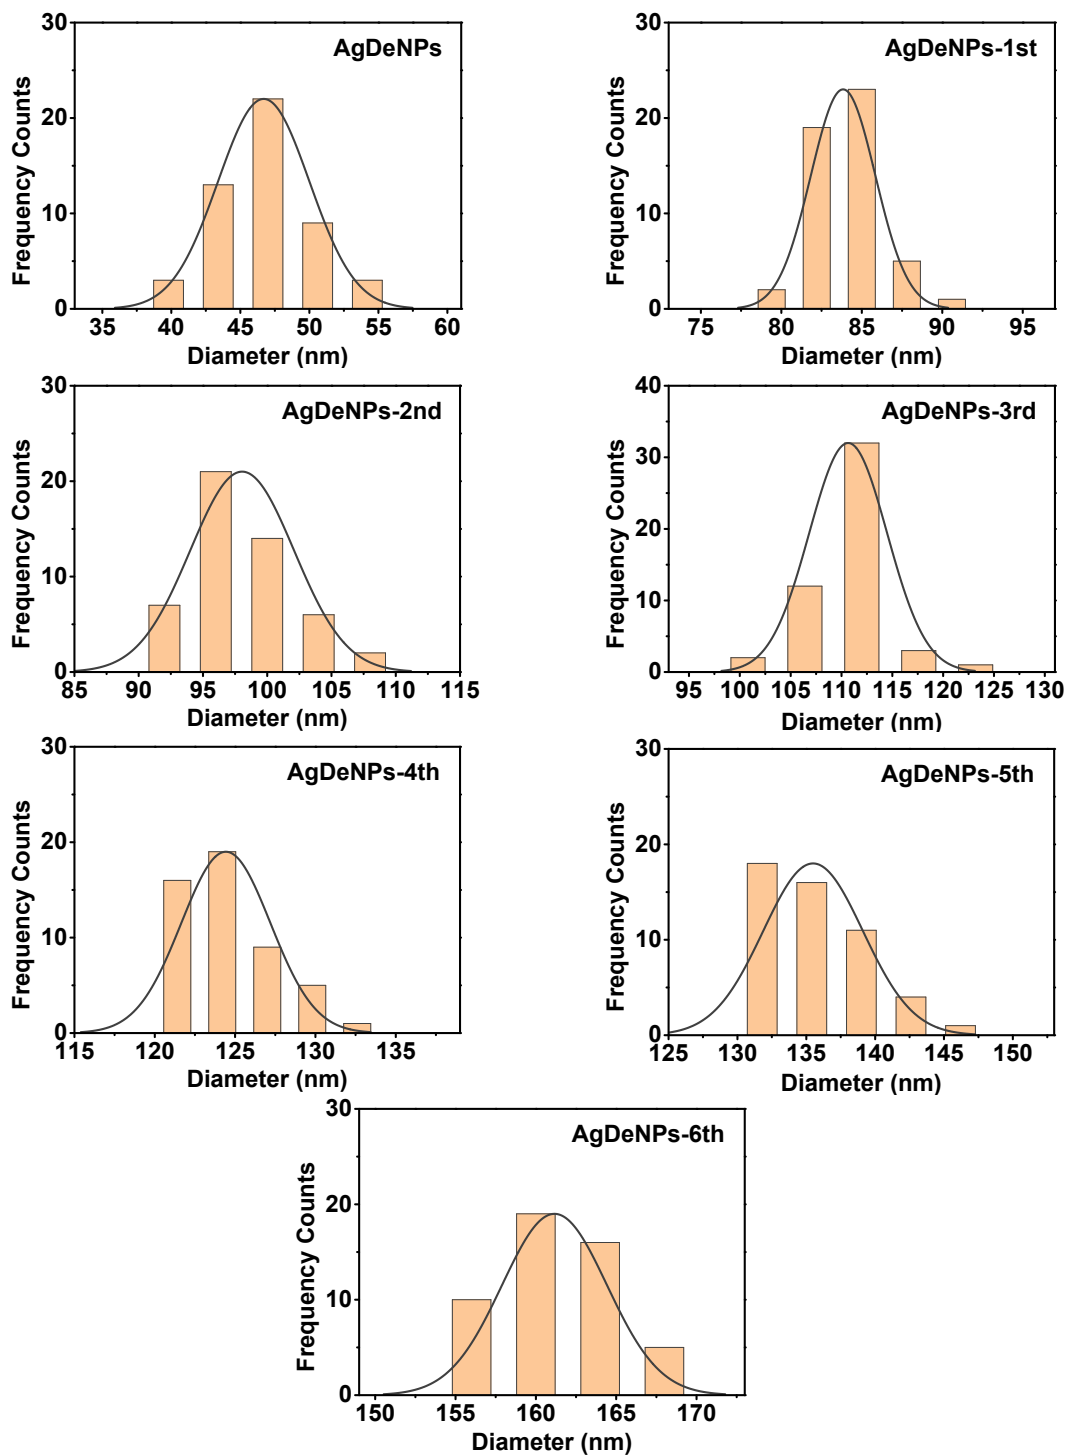

Fig. S2 The size distributions of the AgDeNPs with different sizes:  $47\pm 4$ ,  $85\pm 3$ ,  $96\pm 4$ ,  $112\pm 5$ ,  $124\pm 3$ ,  $135\pm 5$  and  $161\pm 4$  nm.

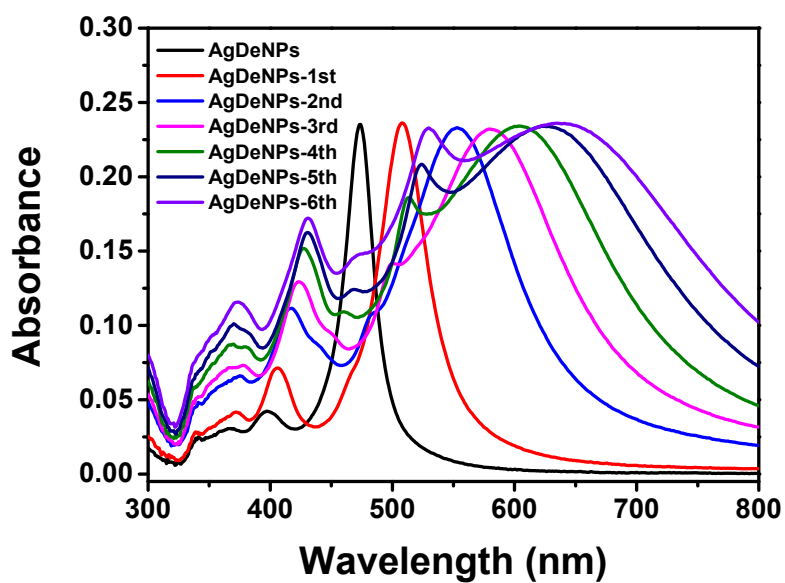

Fig. S3 Extinction spectra of nanoparticle solutions of different sizes being diluted, and the extinction value for each sample is  $0.23 \pm 0.01$ .

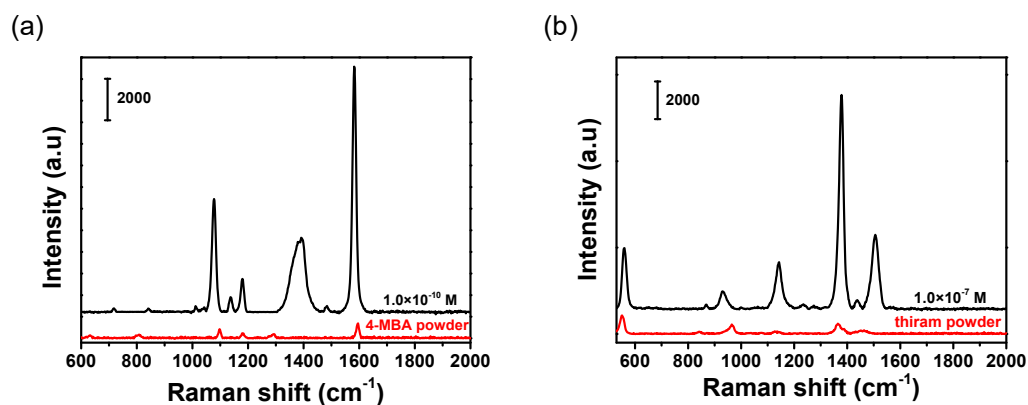

Fig. S4 Comparison of SERS spectra of (a) 4-MBA solution at concentration  $1.0 \times 10^{-10}$  M with Raman spectra of 4-MBA solid powder, (b) thiram solution at concentration  $1.0 \times 10^{-7}$  M with Raman spectra of thiram solid powder.

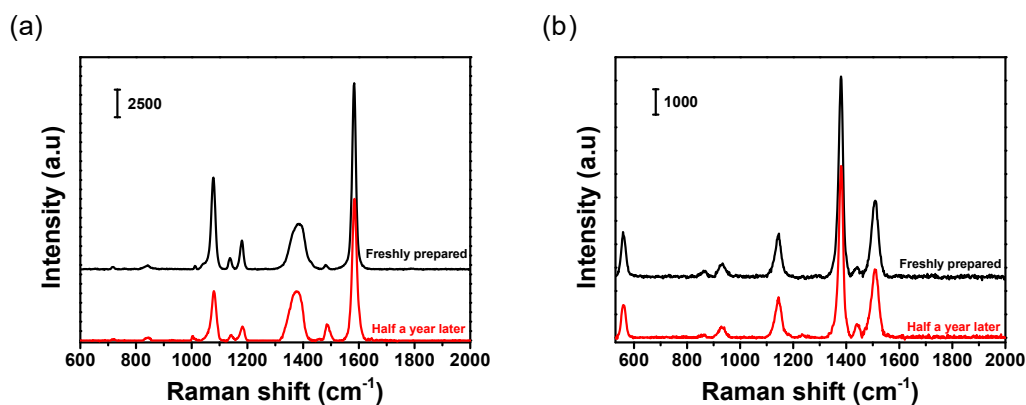

Fig. S5 The SERS spectra of (a) 4-MBA with concentration of  $1.0 \times 10^{-8}$  M and (b) thiram with concentration of  $1.0 \times 10^{-7}$  M were detected by SERS substrates prepared with freshly synthesized AgDeNPs-1st and that placed for half a year, respectively.

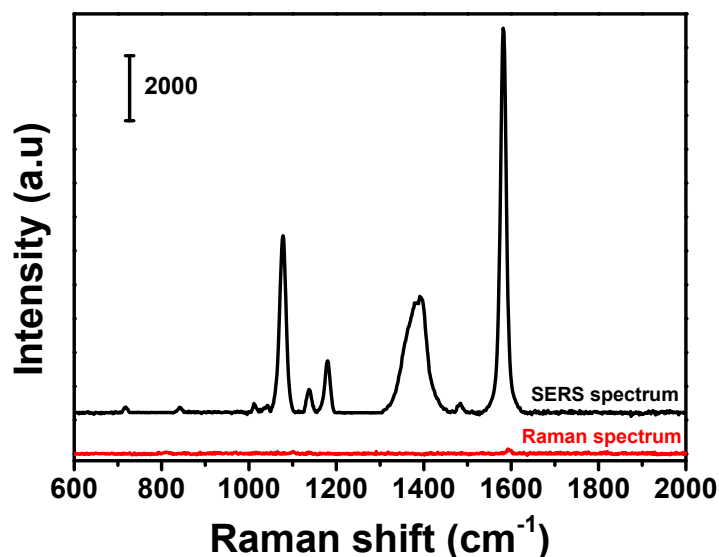

Fig. S6 SERS spectra for 4-MBA at concentration  $1.0 \times 10^{-10}$  M and Raman spectra for 4-MBA at concentration 0.1 M.

Since we ensure the same detection conditions for the two tests, we use formula  $EF = (I_{\text{SERS}} / I_{\text{Raman}}) \times (C_{\text{Raman}} / C_{\text{SERS}})$  to calculate the enhancement factor, which has been deduced by previous work.<sup>1,2</sup> Where  $I_{\text{SERS}}$  and  $I_{\text{Raman}}$  represent the SERS intensity of 4-MBA molecules adsorbed on AgDeNPs-1st substrate at  $1585 \text{ cm}^{-1}$  and the normal Raman intensity of 4-MBA molecules at  $1593 \text{ cm}^{-1}$  respectively,  $C_{\text{SERS}}$  and  $C_{\text{Raman}}$  represent the concentration of 4-MBA molecules in SERS and Raman spectra respectively, the  $C_{\text{Raman}}$  is 0.1 M and the  $C_{\text{SERS}}$  is  $1.0 \times 10^{-10}$  M. The calculated enhancement factor is  $8.7 \times 10^{10}$ .

## References

1. Y. Gu, S. Xu, H. Li, S. Wang, M. Cong, J. R. Lombardi and W. Xu, *J. Phys. Chem. Lett.*, 2013, **4**, 3153-3157.
2. A. Moeinian, F. N. Gur, J. Gonzalez-Torres, L. Zhou, V. D. Murugesan, A. D. Dashtestani, H. Guo, T. L. Schmidt and S. Strehle, *Nano. Lett.*, 2019, **19**, 1061-1066.
